1 **Post-Stroke Physical Activity Improves Middle Cerebral Artery Dynamic Response**

2 Sandra A. Billinger, PT, PhD<sup>1,2,3,4</sup>; Alicen A. Whitaker, DPT<sup>1</sup>; Allegra Morton, BS<sup>1</sup>; Carolyn S.  
3 Kaufman, BS<sup>1,4</sup>; Sophy J Perdomo, PhD<sup>1</sup>; Jaimie L. Ward, MS<sup>1</sup>; Sarah M. Eickmeyer, MD<sup>2</sup>;  
4 Stephen X. Bai, MD<sup>2</sup>; Luke Ledbetter, MD<sup>5</sup>; Michael G. Abraham, MD<sup>3,6</sup>

5  
6 <sup>1</sup>Department of Physical Therapy and Rehabilitation Science, University of Kansas Medical  
7 Center, Kansas City, KS

8 <sup>2</sup>Department of Physical Medicine and Rehabilitation, University of Kansas Medical Center,  
9 Kansas City, KS

10 <sup>3</sup>Department of Neurology, University of Kansas Medical Center, Kansas City, KS

11 <sup>4</sup>Department of Integrative and Molecular Physiology, University of Kansas Medical Center,  
12 Kansas City, KS

13 <sup>5</sup>Department of Diagnostic Radiology, University of Kansas Medical Center, Kansas City, KS

14 <sup>6</sup>Department of Interventional Radiology, University of Kansas Medical Center, Kansas City, KS

15

16 **Corresponding Author:**

17 Sandra A. Billinger, PT, PhD

18 Address: 3901 Rainbow Blvd, Mail Stop 2002, Kansas City, KS 66160

19 Phone number: 913-945-6685

20 Fax: 913-588-9428

21 Email: [sbillinger@kumc.edu](mailto:sbillinger@kumc.edu)

22 **Abstract**

23 **Background and Purpose:** The primary aim was to characterize the middle cerebral artery  
24 blood velocity (MCAv) dynamic response to an acute bout of exercise at 3- and 6-months post  
25 stroke. As a secondary objective, we grouped individuals according to the MCAv dynamic  
26 response to the exercise bout as responder or non-responder. We tested whether physical activity,  
27 aerobic fitness and exercise mean arterial blood pressure (MAP) differed between groups.

28 **Methods:** Transcranial Doppler ultrasound measured MCAv during a 90-second baseline (BL)  
29 followed by a 6-minute moderate intensity exercise bout. Heart rate (HR), MAP and end tidal  
30 CO<sub>2</sub> (P<sub>ET</sub>CO<sub>2</sub>) were additional variables of interest. The MCAv dynamic response variables  
31 included: BL, time delay (TD), amplitude and time constant ( $\tau$ ).

32 **Results:** Individuals enrolled in the study at 3 months post-stroke and the follow up visit  
33 commenced at 6 months post-stroke. Linear mixed model revealed no significant differences in  
34 our selected outcomes across between 3- and 6-months post-stroke. Individuals characterized as  
35 responders demonstrated a faster TD, higher amplitude, reported higher levels of physical  
36 activity and aerobic fitness when compared to the non-responders. No between group  
37 differences were identified for BL,  $\tau$  or exercise MAP. In the non-responders, we observed an  
38 immediate rise in MCAv following exercise onset followed by an immediate decline to near BL  
39 values while the responders showed an exponential rise until steady state was reached.

40 **Conclusions:** The MCAv dynamic response profile has the potential to provide valuable  
41 information during an acute exercise bout following stroke. Individuals with a greater MCAv  
42 response to the exercise stimulus reported regular participation in exercise than those who  
43 reported being sedentary.

## 44 **Introduction**

45 Impaired cerebrovascular hemodynamic response during exercise has been reported in  
46 individuals within one year post-stroke.<sup>1</sup> We previously demonstrated individuals with middle  
47 cerebral artery (MCA) stroke showed no significant differences in resting MCA blood velocity  
48 (MCAv) when compared to age- and sex-matched peers.<sup>2</sup> However, the MCAv dynamic  
49 response during exercise was significantly lower for those post-stroke. Despite the impaired  
50 cerebrovascular response to exercise, a six-month aerobic exercise treadmill training program in  
51 chronic stroke survivors conferred benefit on cerebrovascular reserve for those randomized to the  
52 intervention when compared to controls.<sup>3</sup> This evidence, albeit limited, suggests potential  
53 impairment in cerebrovascular control mechanisms following stroke.

54

55 The primary objective of this study was to characterize the MCAv dynamic response to a  
56 moderate intensity acute exercise bout at 3- and 6-months post stroke. We hypothesized that the  
57 dynamic response profile would improve from 3- to 6-months post-stroke. In our previous work  
58 comparing young and older adults, we excluded one older female participant from analysis as her  
59 data did not fit the exponential model.<sup>4</sup> Rather than exclude participants with stroke whose data  
60 may not fit the exponential model, we decided further scientific inquiry was warranted. As a  
61 secondary objective, we divided participants into responders and non-responders based on the  
62 model fit. We compared physical activity levels and hemodynamic exercise response. We  
63 hypothesized that individuals in the responder group would report greater physical activity,  
64 higher estimated  $\dot{V}\dot{O}_2$  maximum and higher mean arterial blood pressure (MAP) during  
65 exercise when compared to non-responders.

66

67 **Methods**

68 *Participants*

69 We identified individuals post-stroke during the acute or inpatient rehabilitation stay at the  
70 University of Kansas Health System. Inclusion criteria were: 1) unilateral ischemic stroke, 2)  
71 stenosis in the common and internal carotid artery was <70%.<sup>3,5</sup> A radiologist (LL) made this  
72 interpretation using ultrasound imaging or angiogram in the electronic medical record, 3) 35-95  
73 years of age, 4) physician approval for exercise participation, 5) able to walk >10 meters without  
74 physical assistance and 6) able to travel to the university for the experimental protocol.  
75 Exclusion criteria were: 1) unable to consent, 2) inability to perform the exercise movements on  
76 the seated recumbent stepper (T5XR NuStep, Inc. Ann Arbor, MI), 3) diagnosis of other  
77 neurologic disease, and 4) use of supplemental oxygen.

78

79 *Experimental Procedure*

80 Study visits occurred in a laboratory setting at 3- and 6-months post-stroke. Participants were  
81 asked to abstain from caffeine for a minimum of six hours, a meal for two hours, and vigorous  
82 exercise at least twelve hours prior to the study visit.<sup>4,6</sup> The University of Kansas Medical Center  
83 Human Subjects Committee approved all experimental procedures. Institutionally approved  
84 written informed consent was obtained from each individual prior to study participation.

85

86 *Familiarization*

87 The laboratory room in which the experimental protocol took place was dimly lit, quiet and  
88 maintained a constant temperature between 22-24°C.<sup>6</sup> All external stimuli were kept to a minimum.

89 Participants completed the familiarization session as previously described.<sup>2,4,6</sup> Following  
90 familiarization, we obtained height, weight and completed remaining study documents.

91

### 92 *Protocol Set Up*

93 Individuals were instrumented with the following equipment: 1) transcranial Doppler ultrasound  
94 (TCD) (Multigon Industries Inc. Yonkers, NY) and 2-MHz TCD probes for acquisition of  
95 MCAv ( $\text{cm}\cdot\text{sec}^{-1}$ ). The TCD sonographer was blinded to the side of stroke; 2) A 5- lead  
96 electrocardiogram (ECG) (Cardiocard, Nasiff Associates, Central Square, NY) recorded HR; 3)  
97 beat to beat MAP was obtained from the left middle finger (Finometer, Finapres Medical  
98 Systems, Amsterdam, The Netherlands); and 4) nasal cannula and capnograph (BCI Capnocheck  
99 Sleep 9004 Smiths Medical, Dublin, OH) assessed end-tidal carbon dioxide ( $P_{\text{ETCO}_2}$ ). We  
100 monitored  $P_{\text{ETCO}_2}$  to ensure participants did not hyperventilate. Raw data acquisition occurred  
101 through an analog-to-digital unit (NI-USB-6212, National Instruments) and custom written  
102 software operating in MATLAB (v2014a, The Mathworks Inc. Natick, MA).

103

### 104 *Exercise Protocol*

105 We used moderate intensity exercise (45% to 55% of the participant's heart rate reserve) for the  
106 acute exercise bout. We determined the HR range from one of two equations: 1) age-predicted  
107 (220- age) HR maximum ( $\text{HR}_{\text{max}}$ ) or 2)  $164 - 0.72 \times \text{age}$  for participants using beta-blocker  
108 medication.<sup>7</sup>

109

110 The baseline (BL) recording lasted 90 seconds followed by 6 minutes of moderate intensity  
111 exercise. Following the 6-minute exercise bout, the participant engaged in an active cool down

112 for 2 minutes followed by rest until HR, MCA<sub>v</sub> and MAP returned to BL values. Participants  
113 performed a second exercise bout and data points were averaged to optimize signal to noise  
114 ratio.<sup>6</sup> All variables were sampled at 500 Hz and then interpolated to 2.0 Hz. Three-second  
115 averages were calculated and then smoothed using a 9-second sliding window average. We used  
116 R version 3.2.4 (R Core team, Vienna, Austria)<sup>8</sup> with the ‘nls’ function package to model the  
117 response. To ensure data quality, data with R-to-R intervals greater than 5 Hz or changes in peak  
118 blood velocity greater than 10 cm/s in a single cardiac cycle were considered artifact and  
119 censored. If acquisitions had more than 15% of data points censored, they were discarded.

120

#### 121 *MCA<sub>v</sub> and Dynamic Response Profile*

122 Kinetics were modeled for MCA<sub>v</sub> over the entire exercise bout with a mono-exponential model:

$$123 \quad \text{MCA}_v(t) = \text{BL} * (t \leq \text{TD}) + (\text{BL} + \text{Amp}(1 - e^{-(t - \text{TD})/\tau})) * (t > \text{TD})$$

124 where MCA<sub>v</sub>(*t*) is the MCA<sub>v</sub> at any point in time, BL is baseline before exercise onset, Amp is  
125 the peak amplitude of the response above resting BL, TD is the time delay preceding the  
126 exponential increase in MCA<sub>v</sub>, and τ is the time constant or time-to-63% of the peak amplitude.

127

#### 128 *Six-Minute Walk Test (6MWT)*

129 Participants were given a 20-minute rest following the exercise session. HR and blood pressure  
130 were taken to ensure the participant sufficiently recovered from the exercise bout. The 6MWT  
131 was performed in a hallway with no distractions or foot traffic according to guidelines outlined  
132 by the American Thoracic Society.<sup>9</sup>

133

#### 134 *Statistical Analysis*

135 Data are presented as mean  $\pm$  standard deviation. To account for the missing data across study  
136 visits, we used a linear mixed model to test for differences between 3- and 6-months post stroke.  
137 To test for between group differences (responders vs non-responders), we performed one-way  
138 ANOVA or Mann Whitney U as appropriate following visual inspection of probability plots and  
139 Shapiro-Wilk tests. Fisher exact tests were used for categorical data. Differences were  
140 considered significant when  $p < 0.05$ .

141

## 142 **Results**

### 143 *Participant Characteristics*

144 We consented 27 participants into the study. One person was consented twice as this individual  
145 experienced 2 separate stroke events and has been published as a case report.<sup>10</sup> Data from the  
146 second stroke was not included. Participant demographics (n=26) at enrollment are presented in  
147 Table 1. No serious adverse events occurred during any study visit.

148

149 Eighteen participants (72.2% male) returned for the 6-month visit. Participants were  $65.7 \pm 14.1$   
150 years of age and  $188.4 \pm 14.1$  days post-stroke. 83.3% identified as Caucasian, 0% Hispanic,  
151 22.2% African American and 5.6% Native American. Multiple race categories were selected.  
152 Reasons for loss to follow up included: unable to contact (n = 2); participant's son had a stroke  
153 (n = 1); hospitalized (n = 1); visit scheduled but did not attend study visit (n = 2); no  
154 transportation (n = 1) and participant died (n = 1).

155

### 156 *MCAv Dynamic Response Across Time*

157 3-Month Visit. Of the 26 participants, four individuals were excluded from analysis due to: a  
158 valid MCAv signal was not acquired, n = 3 and poor MCAv signal acquisition during exercise,  
159 n=1. Data are presented for 22 participants.

160  
161 6-Month Visit. Of the 18 individuals who returned, we excluded 3 datasets from analysis.  
162 Reasons for exclusion included an invalid MCAv signal, n = 2 and poor MCAv signal  
163 acquisition during exercise, n=1. Statistical analyses were conducted on 15 datasets.

164  
165 The MCAv BL and kinetic measures during moderate intensity exercise showed no differences  
166 over time for the stroke affected and non-stroke affected MCAv (Table 2). We found no  
167 differences between race (p = 0.09) or sex (p = 0.21) for all MCAv data and hemodynamic data  
168 (blood pressure, heart rate and P<sub>ET</sub>CO<sub>2</sub>) at rest and during exercise at either 3- or 6-month visits.

169

170 *Responders and Non-Responders (3 Months Post-stroke)*

171 MCAv Dynamic Response

172 Table 3 presents demographics for each group. We observed 12 participants whose MCAv  
173 increased in a close-to-exponential pattern being well-fit by a delay + exponential function  
174 (responders). The remaining 10 individuals (non-responders) demonstrated poor model fit with  
175 visual inspection (n = 5), non-exponential response (n = 4) or MCAv was below BL (n = 1) after  
176 exercise onset on the stroke affected side. On the non-stroke affected side, MCAv decreased  
177 below BL after exercise onset for the same individual (n = 1) and we observed a non-exponential  
178 response in the other participants (n = 9). No between group differences were reported for age,  
179 body mass index, 6MWT or the MoCA. The responders were more likely to report taking a statin



180 medication, had greater physical activity levels and had higher estimated  $\dot{V}\dot{O}_2$  maximum values  
181 ( $p < 0.05$ ).

182  
183 Figure 1 shows the BL and MCAv response after the onset of moderate intensity exercise for  
184 responders and non-responders. Data from the MCAv kinetics analysis are presented in Table 4.  
185 During seated rest prior to exercise onset, BL data for the stroke affected and non-stroke affected  
186 MCAv were not significantly different between groups. After exercise onset, MCAv amplitude  
187 on the stroke affected side was significantly reduced in the non-responders. This finding is  
188 expected based on group assignment (responder/non-responder). For the 5 participants with poor  
189 model fit, we observed a significantly slower TD response for the non-responders on the stroke  
190 affected side while the  $\tau$  was not different. Only one person in the non-responder group had data  
191 for analysis that fit the model, although a negative amplitude (below BL). The remaining  
192 participants ( $n = 9$ ) showed a non-exponential response.

193  
194 Baseline and Exercise Response in MAP,  $P_{ET}CO_2$  and HR

195 The baseline and exercise-induced responses ( $\Delta$ ) in MAP,  $P_{ET}CO_2$  and HR are shown in Table 4.  
196 The BL and steady state exercise for MAP,  $P_{ET}CO_2$  and HR were not significantly different. We  
197 found between group differences for  $\Delta MAP$  and  $\Delta HR$  ( $p < 0.025$ ) but not  $\Delta P_{ET}CO_2$  ( $p = 0.22$ ).

198  
199 *Responders and Non-Responders (6 Months Post-stroke)*

200 All individuals characterized as a responder at the 3-month visit remained at the 6-month visit.  
201 Three individuals initially characterized as a non-responder met the criteria for responder. Of  
202 these three individuals, two increased their physical activity score from a 2 (low intensity

203 walking for 10 minutes or less) to a 5 (vigorous activity). The other individual remained in the  
204 category of 2 for both visits. Three individuals changed medications related to blood pressure,  
205 anticoagulation or antiplatelet therapy that may have influenced MCAv response or other  
206 hemodynamic measures at rest or during exercise. In the responder group, one person  
207 discontinued clopidogrel. In the non-responder group, lisinopril was added to the medication list  
208 while another person reported discontinued use of lisinopril, furosemide and clopidogrel.

209  
210 There were no group differences between responders (n = 10) and non-responders (n = 5) for age  
211 (p = 0.06), time post-stroke (6-month visit, p = 0.47), BMI (p = 0.58), MoCA score (p = 0.54),  
212 mRS (p = 0.40) or self-reported physical activity score (p = 0.10). We report significant  
213 differences for the non-exercise estimate for  $V\dot{V}O_2$  maximum (p < 0.01) and six-minute walk test  
214 (p = 0.02).

215

### 216 MCAv Dynamic Response

217 Responders worked at a higher workload (p = 0.04) with no significant differences in the rate of  
218 perceived exertion (p = 0.96). BL MCAv was not different between groups for the stroke  
219 affected (p = 0.58) and non-stroke affected MCA (p = 0.87). For the stroke affected MCA, the  
220 non-responders showed a significantly slower TD (p = 0.04) and lower amplitude (p = 0.04)  
221 while  $\tau$  was not different (p = 0.93). For the non-stroke affected MCA, no between group  
222 significant differences were found for any MCAv dynamic response variables.

223

### 224 Baseline and Exercise Response in MAP, $P_{ET}CO_2$ and HR

225 No between group differences were found for resting and exercise hemodynamic responses,  
226  $\Delta$ MAP,  $\Delta$ HR or  $\Delta$  P<sub>ET</sub>CO<sub>2</sub>.

227

## 228 **Discussion**

229 Aerobic exercise, identical to the intensity used in this study, is recommended for overall health  
230 post-stroke.<sup>11</sup> This study provides novel and relevant information regarding cerebrovascular  
231 response to moderate intensity exercise for individuals at 3- and 6-months post-stroke. The main  
232 primary findings of the current investigation are: 1) MCAv kinetic response was stable from 3 to  
233 6 months post-stroke for bilateral MCA and 2) MCAv kinetic response (amplitude and TD)  
234 significantly differed for those with higher estimated  $\dot{V}\dot{O}_2$  maximum. This finding was  
235 consistent for the stroke affected MCA at 3- and 6-months.

236

### 237 *MCAv Dynamic Response Across Time*

238 The primary objective of this study was to characterize the MCAv response at 3- and 6- months  
239 post-stroke. To our knowledge, this longitudinal cerebrovascular assessment at rest and in  
240 response to exercise had not been previously conducted. We hypothesized that the MCAv  
241 dynamic response profile would improve from 3 to 6 months post-stroke. This rationale was  
242 developed from published work highlighting improved longitudinal changes in aerobic fitness at  
243 1, 3 and 6 months post-stroke<sup>12</sup> and aerobic fitness positively influences peripheral vascular  
244 health measures in individuals post-stroke.<sup>13</sup> Our hypothesis that MCAv dynamic response  
245 would improve with time was not supported by our findings. We have reported high  
246 reproducibility within older adults for resting and exercise MCAv<sup>14</sup> and bilateral reproducibility

247 for the MCAv kinetic measures.<sup>6</sup> Therefore, measurement error from our sonographers (SP, CK)  
248 was unlikely.

249

### 250 *MCAv Dynamic and Hemodynamic Responses 3 Months Post-Stroke*

251 During exercise onset, neural activation increases the metabolic requirements of the brain above  
252 resting values in order to maintain normal function<sup>15-18</sup> and this demand is met with increased  
253 cerebral blood flow. Our laboratory<sup>6,19</sup> and others<sup>17,18,20</sup> have shown that moderate intensity  
254 continuous exercise produces the greatest increase in MCAv compared to low and high intensity  
255 (above anaerobic threshold) continuous exercise.

256

257 Ten of the twenty-one individuals enrolled demonstrated a non-exponential MCAv response  
258 (non-responders) following exercise onset. This could be indicative of slowed vasomotor control  
259 within the cerebrovasculature as both sides showed slower MCAv kinetics or non-exponential  
260 MCAv increase.<sup>4</sup> When considering potential factors, the data in Table 3 show no between group  
261 differences for age, sex, race or ethnicity, time of study visit, or the calculated lesion size (SXB)  
262 from the electronic medical record.<sup>21,22</sup> We found responders had greater statin use, self-reported  
263 physical activity levels and estimated  $V\dot{V}O_2$  maximum values. One previous study grouped  
264 healthy young adults based on self-reported physical activity levels into low and high fitness.<sup>23</sup>  
265 Those in the high fitness group demonstrated a greater change in MCAv in response to  
266 rebreathing-induced hypercapnia while no resting MCAv differences were found. This finding,  
267 combined with the present study, underscores the value in considering dynamic challenges such  
268 as exercise. Further, others have reported that physically active individuals with higher  $V\dot{V}O_2$   
269 maximum values exhibit better cerebral hemodynamics than sedentary individuals.<sup>24,25</sup> Although

270 the evidence reporting the dynamic cerebrovascular response to exercise in stroke is  
271 limited,<sup>1,2,6,10</sup> the present study suggests that physical activity and exercise post-stroke may  
272 confer some benefit to overall cerebrovascular health. We acknowledge individuals in the  
273 responder group also reported a significantly higher use of statin medications. One study showed  
274 3 months of statin treatment after stroke improved cerebrovascular reactivity compared to the  
275 control group while no differences in resting cerebral blood flow were reported.<sup>26</sup> Our planned  
276 future work aims to test whether aerobic exercise interventions can increase the MCAv kinetic  
277 response profile and other cerebrovascular outcomes after stroke.

278  
279 The BL values and steady state hemodynamic responses during the exercise bout were not  
280 significantly different between groups. We report between group differences for  $\Delta$ MAP and  
281  $\Delta$ HR. We acknowledge that these differences may be largely driven by the significantly higher  
282 workload in the responder group, which likely influenced the MCAv amplitude response. One  
283 individual (responder) who exercised at 110 watts largely influenced the difference in work rate.  
284 He was an avid cyclist prior to his stroke and interestingly, had the largest stroke lesion at  
285 admission to the hospital. We report no between group differences for BL, steady state or  
286  $\Delta$ P<sub>ET</sub>CO<sub>2</sub>. We are confident that the lower MCAv amplitude in the non-responders is not the  
287 result of hyperventilation. We closely monitor P<sub>ET</sub>CO<sub>2</sub> during the exercise bout to ensure our  
288 participants stay within the prescribed HR range without hyperventilation.<sup>6</sup>

289  
290 The literature is well-established that MAP increases with age<sup>27</sup> and after stroke,<sup>11</sup> which  
291 provides unique opportunities to study exercise-induced changes in MAP and HR. The  
292 cerebrovasculature and the associated neuroprotective mechanisms have the ability to

293 autoregulate and buffer the sudden acute increases in MAP associated across various exercise  
294 intensities.<sup>28</sup> As observed in Figure 1, the non-responders show a rapid rise in the MCAv  
295 response to exercise followed by an immediate decline with steady state values near BL. One  
296 proposed hypothesis for this unexpected response may be an impairment in the cerebrovascular  
297 control mechanisms following stroke.<sup>6</sup> Despite the increased neural activation with exercise and  
298 demand for energy, MCAv did not increase. Another plausible explanation may be an  
299 impairment in the feed-forward signals coming from the motor cortex to increase MCAv  
300 concomitantly with neuromuscular innervation.<sup>4,29</sup> Our data extend current knowledge regarding  
301 cerebrovascular response to exercise and is timely given the increased interest and concern for  
302 the role of high-intensity interval training on cerebrovascular response, especially for those with  
303 neurological conditions such as stroke.<sup>28,30,31</sup> The authors of these review papers<sup>28,31</sup> and a recent  
304 study describing the cerebrovascular response to a 30-second bout of high intensity exercise<sup>30</sup>  
305 suggest that caution should be taken when implementing this type of protocol, as the evidence  
306 for safety with respect to the brain and its delicate cerebrovasculature has not been tested. A  
307 recently published clinical practice guideline for physical therapy suggests higher locomotor  
308 intensities benefit walking speed and endurance in chronic stroke.<sup>32</sup> The current knowledge of  
309 cerebrovascular control during an acute exercise bout, especially following stroke, is still in its  
310 infancy and warrants further investigation.

311

### 312 *MCAv Dynamic and Hemodynamic Responses 6 Months Post-Stroke*

313 In the chronic phase of stroke recovery, the responders continued to exercise at higher  
314 workloads, which may have influenced cerebrovascular response during the exercise bout. At  
315 this study visit, only differences in TD and amplitude on the stroke affected vessel remained. All

316 other MCAv kinetic variables and hemodynamic responses were not significant. The reduced  
317 sample size warrants caution when interpreting the findings. A noteworthy observation is two of  
318 the three newly characterized responders had increased their self-reported physical activity.  
319 Whether the increase in physical activity was the primary driver of the higher MCAv amplitude  
320 responses remains an important query for future work.

321  
322 Several limitations in the study design should be considered. First, as with all studies using  
323 transcranial Doppler ultrasound, the assumption of constant MCA diameter is important in order  
324 for the MCA<sub>v</sub> to be used as a direct proxy for cerebral blood flow.<sup>6</sup> Second, maximal exercise  
325 testing was not performed to determine maximal heart rate to more accurately prescribe the  
326 moderate intensity exercise session. However, as evidenced by the increase in P<sub>ET</sub>CO<sub>2</sub> during  
327 exercise, it is unlikely that individuals exercised above anaerobic levels. Third, we observed an  
328 increase in BL MCAv prior to exercise onset. This could be an anticipatory response or  
329 nervousness to our verbal instructions 15 seconds prior to exercise onset.

330

### 331 **Conclusion**

332 The cerebrovascular response to acute exercise remained stable between 3- and 6-months post-  
333 stroke. Physical activity participation may positively influence the MCAv dynamic response  
334 during exercise. Further exploration into the cerebrovascular control mechanisms or other stroke-  
335 specific characteristics that may result in a diminished response (non-responders) to exercise and  
336 various intensities is needed. The MCAv kinetic response may better inform future exercise trials  
337 designed to benefit overall brain health.

338

339 **Acknowledgments**

340 We would like to thank Yumei Liu, MD, PhD and Emily Nardo for their assistance with data  
341 collection and Madison Henry, SPT for her assistance with data organization.

342

343 **Sources of funding**

344 Dr. Billinger was supported by the Eunice Kennedy Shriver National Institute of Child Health  
345 and Human Development (K01HD067318) and the Wohlgemuth Faculty Scholar Award. Dr.  
346 Whitaker and Ms. Morton were supported in part by T32HD057850 from the Eunice Kennedy  
347 Shriver National Institute of Child Health and Human Development. Ms. Morton received  
348 support from a Student Scholarship in Cerebrovascular Disease and Stroke (American Heart  
349 Association). Dr. Perdomo received partial support from the University of Kansas Alzheimer's  
350 Disease Center (P30AG035982), the KU Medical Center Biomedical Research Training Program  
351 and from the National Institute on Aging Diversity Supplement to R01 AG058162. REDCap at  
352 University of Kansas Medical Center is supported by CTSA Award (UL1TR000001) from  
353 NCCR and NCATS. This work was supported from NCATS awarded to the University of  
354 Kansas for Frontiers: Clinical and Translational Science Institute (UL1TR002366) The contents  
355 are solely the responsibility of the authors and do not necessarily represent the official views of  
356 the NIH or NCATS.

357

358 **Disclosures**

359 SAB reports a patent pending (18KU028M-02). MA reports consulting for Stryker  
360 Neurovascular and Penumbra Inc. outside the submitted work. AW, AM, CK, SP, JW, SE, SB,  
361 and LL report no conflicts of interest.



362 **References**

- 363 1. Robertson AD, Atwi S, Kostoglou K, et al. Cerebrovascular Pulsatility During Rest and  
364 Exercise Reflects Hemodynamic Impairment in Stroke and Cerebral Small Vessel  
365 Disease. *Ultrasound in medicine & biology*. 2019;45(12):3116-3127.
- 366 2. Kempf KS, Whitaker AA, Lui Y, et al. The Effect of Stroke on Middle Cerebral Artery  
367 Blood Flow Velocity Dynamics During Exercise. *J Neurol Phys Ther*. 2019;43(4):212-  
368 219.
- 369 3. Ivey FM, Ryan AS, Hafer-Macko CE, Macko RF. Improved cerebral vasomotor  
370 reactivity after exercise training in hemiparetic stroke survivors. *Stroke*.  
371 2011;42(7):1994-2000.
- 372 4. Ward JL, Craig JC, Liu Y, et al. Effect of Healthy Aging and Sex on Middle Cerebral  
373 Artery Blood Velocity Dynamics During Moderate Intensity Exercise. *American journal*  
374 *of physiology Heart and circulatory physiology*. 2018.
- 375 5. Guo ZN, Liu J, Xing Y, et al. Dynamic cerebral autoregulation is heterogeneous in  
376 different subtypes of acute ischemic stroke. *PLoS One*. 2014;9(3):e93213.
- 377 6. Billinger SA, Craig JC, Kwapiszeski SJ, Sisante J-FV, Vidoni ED, Maletsky R.  
378 Dynamics of middle cerebral artery blood flow velocity during moderate intensity  
379 exercise. In. *Journal of Applied Physiology*2017.
- 380 7. Brawner CA, Ehrman JK, Schairer JR, Cao JJ, Keteyian SJ. Predicting maximum heart  
381 rate among patients with coronary heart disease receiving beta-adrenergic blockade  
382 therapy. *Am Heart J*. 2004;148(5):910-914.
- 383 8. *A language and environment for statistical computing*. [computer program]. Vienna,  
384 Austria: R Foundation for Statistical Computing; 2013.

- 385 9. Crapo RO, Casaburi R, Coates AL, et al. ATS Statement: Guidelines for Six-Minute  
386 Walk Test. *American Journal of Respiratory and Critical Care Medicine*. 2002;166:111 -  
387 117.
- 388 10. Kaufman CS, Bai SX, Ward JL, Eickmeyer SM, Billinger SA. Middle cerebral artery  
389 velocity dynamic response profile during exercise is attenuated following multiple  
390 ischemic strokes: a case report. *Physiol Rep*. 2019;7(21):e14268.
- 391 11. Billinger SA, Arena R, Bernhardt J, et al. Physical Activity and Exercise  
392 Recommendations for Stroke Survivors: A Statement for Healthcare Professionals From  
393 the American Heart Association/American Stroke Association. *Stroke*. 2014;45(8):2532-  
394 2553.
- 395 12. Mackay-Lyons MJ, Makrides L. Longitudinal changes in exercise capacity after stroke.  
396 *Arch Phys Med Rehabil*. 2004;85(10):1608-1612.
- 397 13. Billinger SA, Mattlage AE, Ashenden AL, Lentz AA, Harter G, Rippee MA. Aerobic  
398 exercise in subacute stroke improves cardiovascular health and physical performance. *J*  
399 *Neurol Phys Ther*. 2012;36(4):159-165.
- 400 14. Perdomo SJ, Ward J, Liu Y, et al. Cardiovascular Disease Risk Is Associated With  
401 Middle Cerebral Artery Blood Flow Velocity in Older Adults. *Cardiopulmonary Physical*  
402 *Therapy Journal*. 2020;31(2):38-46.
- 403 15. Gonzalez-Alonso J, Dalsgaard MK, Osada T, et al. Brain and central haemodynamics and  
404 oxygenation during maximal exercise in humans. *J Physiol*. 2004;557(Pt 1):331-342.
- 405 16. Jorgensen LG, Perko M, Hanel B, Schroeder TV, Secher NH. Middle cerebral artery flow  
406 velocity and blood flow during exercise and muscle ischemia in humans. *Journal of*  
407 *applied physiology*. 1992;72(3):1123-1132.

- 408 17. Linkis P, Jorgensen LG, Olesen HL, Madsen PL, Lassen NA, Secher NH. Dynamic  
409 exercise enhances regional cerebral artery mean flow velocity. *Journal of applied*  
410 *physiology*. 1995;78(1):12-16.
- 411 18. Moraine JJ, Lamotte M, Berre J, Niset G, Leduc A, Naeije R. Relationship of middle  
412 cerebral artery blood flow velocity to intensity during dynamic exercise in normal  
413 subjects. *European journal of applied physiology and occupational physiology*.  
414 1993;67(1):35-38.
- 415 19. Witte E, Liu Y, Ward JL, et al. Exercise intensity and middle cerebral artery dynamics in  
416 humans. *Respir Physiol Neurobiol*. 2019;262:32-39.
- 417 20. Ide K, Horn A, Secher NH. Cerebral metabolic response to submaximal exercise. *Journal*  
418 *of applied physiology*. 1999;87(5):1604-1608.
- 419 21. Newman GC. Clarification of abc/2 rule for ICH volume. *Stroke*. 2007;38(3):862.
- 420 22. Majersik JJ, Cole JW, Golledge J, et al. Recommendations from the international stroke  
421 genetics consortium, part 1: standardized phenotypic data collection. *Stroke*.  
422 2015;46(1):279-284.
- 423 23. Hwang J, Kim K, Brothers RM, Castelli DM, Gonzalez-Lima F. Association between  
424 aerobic fitness and cerebrovascular function with neurocognitive functions in healthy,  
425 young adults. *Exp Brain Res*. 2018;236(5):1421-1430.
- 426 24. Ainslie PN, Cotter JD, George KP, et al. Elevation in cerebral blood flow velocity with  
427 aerobic fitness throughout healthy human ageing. *J Physiol*. 2008;586(16):4005-4010.
- 428 25. Bailey DM, Marley CJ, Brugniaux JV, et al. Elevated aerobic fitness sustained  
429 throughout the adult lifespan is associated with improved cerebral hemodynamics. *Stroke*.  
430 2013;44(11):3235-3238.

- 431 26. Pretnar-Oblak J, Sabovic M, Sebestjen M, Pogacnik T, Zaletel M. Influence of  
432 atorvastatin treatment on L-arginine cerebrovascular reactivity and flow-mediated  
433 dilatation in patients with lacunar infarctions. *Stroke*. 2006;37(10):2540-2545.
- 434 27. Hart EC, Joyner MJ, Wallin BG, Charkoudian N. Sex, ageing and resting blood pressure:  
435 gaining insights from the integrated balance of neural and haemodynamic factors. *J*  
436 *Physiol*. 2012;590(9):2069-2079.
- 437 28. Lucas SJ, Cotter JD, Brassard P, Bailey DM. High-intensity interval exercise and  
438 cerebrovascular health: curiosity, cause, and consequence. *J Cereb Blood Flow Metab*.  
439 2015;35(6):902-911.
- 440 29. Sato K, Sadamoto T, Ueda-Sasahara C, et al. Central command and the increase in  
441 middle cerebral artery blood flow velocity during static arm exercise in women.  
442 *Experimental physiology*. 2009;94(11):1132-1138.
- 443 30. Labrecque L, Drapeau A, Rahimaly K, Imhoff S, Billaut F, Brassard P. Comparable  
444 blood velocity changes in middle and posterior cerebral arteries during and following  
445 acute high-intensity exercise in young fit women. *Physiol Rep*. 2020;8(9):e14430.
- 446 31. Calverley TA, Ogoh S, Marley CJ, et al. HIITing the brain with exercise; mechanisms,  
447 consequences and practical recommendations. *J Physiol*. 2020.
- 448 32. Hornby TG, Reisman DS, Ward IG, et al. Clinical Practice Guideline to Improve  
449 Locomotor Function Following Chronic Stroke, Incomplete Spinal Cord Injury, and  
450 Brain Injury. *J Neurol Phys Ther*. 2020;44(1):49-100.

451

**Table 1. Participant Demographics (n = 26)**

|                                                                           |              |
|---------------------------------------------------------------------------|--------------|
| Age (years)                                                               | 63.0 ± 14.0  |
| Sex % (n)                                                                 |              |
| Female                                                                    | 31% (8)      |
| Male                                                                      | 69% (18)     |
| Race/Ethnicity* (n)                                                       |              |
| White                                                                     | 18           |
| Black                                                                     | 8            |
| Native American                                                           | 1            |
| Hispanic/Latino                                                           | 0            |
| Asian                                                                     | 1            |
| Pacific Islander                                                          | 0            |
| tPA (n)                                                                   | 14           |
| Thrombectomy (n)                                                          | 9            |
| tPA and Thrombectomy (n)                                                  | 3            |
| Resting SBP (mm Hg)                                                       | 138.5 ± 18.3 |
| Resting DBP (mm Hg)                                                       | 80.4 ± 11.2  |
| BMI (kg*(m <sup>2</sup> ) <sup>-1</sup> )                                 | 29.8 ± 5.5   |
| Time Post Stroke to 3-month visit (days)                                  | 96.3 ± 12.6  |
| Lesion Size (cm <sup>3</sup> )                                            | 40.2 ± 76.5  |
| Estimated $V\dot{V}O_2$ maximum (ml*kg <sup>-1</sup> *min <sup>-1</sup> ) | 23.2 ± 8.9   |
| Medications (n)                                                           |              |
| Beta Blocker                                                              | 17           |
| Calcium Channel Blocker                                                   | 7            |
| ACE Inhibitor                                                             | 5            |
| Angiotensin II Receptor Blocker                                           | 5            |
| Statins                                                                   | 19           |
| Diuretics                                                                 | 3            |
| Blood Thinners                                                            | 12           |
| Aspirin                                                                   | 12           |
| Metformin                                                                 | 5            |
| Insulin                                                                   | 6            |
| Antidepressants                                                           | 9            |

Data are presented as Mean ± SD unless stated otherwise. \*Multiple race categories selected. tPA = Tissue Plasminogen Activator; SBP = Resting Systolic Blood Pressure; DBP = Resting Diastolic Blood Pressure; BMI = Body Mass Index;  $V\dot{V}O_2$  = oxygen uptake; ACE= Angiotensin Converting Enzyme.

**Table 2. Kinetic Response Across Time**

|                                                                                                                                | 3 months<br>(n=22) | 3 months<br>95 CI | 6 months<br>(n=15) | 6 months<br>95 CI | F-test | P-value |
|--------------------------------------------------------------------------------------------------------------------------------|--------------------|-------------------|--------------------|-------------------|--------|---------|
| <b>Stroke Affected MCAv</b>                                                                                                    |                    |                   |                    |                   |        |         |
| BL (cm*s <sup>-1</sup> )                                                                                                       | 51.1 ± 16.3        | 43.9-58.4         | 50.2 ± 12.5        | 43.3-57.1         | 1.9    | 0.19    |
| TD (s)                                                                                                                         | 55.6 ± 57.4        | 26.1-85.1         | 59.0 ± 52.6        | 25.5-92.4         | 0.2    | 0.70    |
| Amp (cm*s <sup>-1</sup> )                                                                                                      | 5.5 ± 5.8          | 2.6-8.3           | 5.8 ± 5.2          | 2.5-9.0           | 0.3    | 0.63    |
| τ (s)                                                                                                                          | 34.6 ± 34.6        | 16.8-52.4         | 53.9 ± 53.9        | 19.6-88.1         | 1.6    | 0.24    |
| <b>Non-Stroke Affected MCAv</b>                                                                                                |                    |                   |                    |                   |        |         |
| BL (cm*s <sup>-1</sup> )                                                                                                       | 62.1 ± 23.7        | 50.7-73.6         | 56.2 ± 12.8        | 48.8-63.6         | 1.3    | 0.27    |
| TD (s)                                                                                                                         | 42.2 ± 38.6        | 17.7-66.7         | 62.7 ± 38.8        | 38.0-87.4         | 3.0    | 0.11    |
| Amp (cm*s <sup>-1</sup> )                                                                                                      | 7.2 ± 5.8          | 3.5-10.90         | 7.3 ± 4.7          | 4.3-10.30         | 0.4    | 0.56    |
| τ (s)                                                                                                                          | 25.4 ± 19.1        | 13.3-37.5         | 21.0 ± 27.3        | 3.6-38.3          | 0.0    | 0.91    |
| Data are presented as Mean ± SD. CI= Confidence Interval; BL= Baseline MCAv; TD= Time Delay; Amp= Amplitude; τ = Time Constant |                    |                   |                    |                   |        |         |

**Table 3. Characteristics of Responders and Non-Responders**

|                                                                                | Responders<br>(n=12) | Responders<br>95 CI | Non-<br>Responders<br>(n=10) | Non-<br>Responders 95<br>CI | F-test | P-value |
|--------------------------------------------------------------------------------|----------------------|---------------------|------------------------------|-----------------------------|--------|---------|
| Age (years)                                                                    | 59.4 ± 12.5          | 51.5-67.4           | 67.3 ± 16.1                  | 55.8-78.8                   | 1.7    | 0.21    |
| Sex % (n)                                                                      |                      |                     |                              |                             |        |         |
| Female                                                                         | 63% (5)              |                     | 37% (3)                      |                             |        |         |
| Male                                                                           | 50% (7)              |                     | 50% (7)                      |                             |        | 0.68    |
| Race/Ethnicity* (n)                                                            |                      |                     |                              |                             |        |         |
| White                                                                          | 10                   |                     | 5                            |                             |        | 0.17    |
| Black                                                                          | 2                    |                     | 5                            |                             |        | 0.17    |
| Native American                                                                | 0                    |                     | 1                            |                             |        | 0.46    |
| Hispanic/Latino                                                                | 0                    |                     | 0                            |                             |        |         |
| Asian                                                                          | 0                    |                     | 1                            |                             |        | 0.46    |
| Pacific Islander                                                               | 0                    |                     | 0                            |                             |        |         |
| Time Post Stroke to 3-month visit (days)                                       | 94.8 ± 8.3           | 89.5-100.0          | 99.5 ± 18.0                  | 86.6-112.4                  | 0.7    | 0.42    |
| BMI (kg*(m <sup>2</sup> ) <sup>-1</sup> )                                      | 31.2 ± 6.2           | 27.3-35.2           | 28.2 ± 4.9                   | 24.7-31.8                   | 1.5    | 0.24    |
| Lesion Size (cm <sup>3</sup> )                                                 | 70.6 ± 97.4          | -4.2-145.5          | 20.7 ± 52.5                  | -23.2-64.5                  | 1.7    | 0.22    |
| Estimated $\dot{V}\dot{O}_2$ maximum (ml*kg <sup>-1</sup> *min <sup>-1</sup> ) | 26.6 ± 8.9           | 20.9-32.3           | 18.3 ± 8.0                   | 12.6-24.0                   | 5.2    | 0.03    |
| Physical Activity Score                                                        | 2.8 ± 1.3            | 1.9-3.6             | 1.6 ± 0.7                    | 1.1-2.1                     | 6.4    | 0.02    |
| MoCA                                                                           | 22.0 ± 5.8           | 18.3-25.7           | 23.8 ± 3.3                   | 21.4-26.2                   | 0.8    | 0.39    |
| mRS                                                                            | 2.1 ± 0.9            | 1.5-2.5             | 2.2 ± 1.0                    | 1.5-2.9                     | 0.3    | 0.62    |
| 6-minute Walk Test (m)                                                         | 338.4 ± 128.0        | 257.1-419.8         | 264.6 ± 128.9                | 165.5-363.6                 | 1.7    | 0.21    |
| Thrombectomy (n)                                                               | 4                    |                     | 1                            |                             |        | 0.32    |
| tPA and Thrombectomy (n)                                                       | 2                    |                     | 1                            |                             |        | 1.00    |
| tPA (n)                                                                        | 3                    |                     | 6                            |                             |        | 0.19    |
| Medications (n)                                                                |                      |                     |                              |                             |        |         |
| Beta Blocker                                                                   | 8                    |                     | 7                            |                             |        | 1.00    |
| Calcium Channel Blocker                                                        | 5                    |                     | 2                            |                             |        | 0.38    |
| ACE Inhibitor                                                                  | 4                    |                     | 0                            |                             |        | 0.10    |

|                                 |    |   |      |
|---------------------------------|----|---|------|
| Angiotensin II Receptor Blocker | 3  | 2 | 1.00 |
| Statins                         | 11 | 6 | 0.03 |
| Diuretics                       | 1  | 1 | 1.00 |
| Blood Thinners                  | 7  | 4 | 0.67 |
| Aspirin                         | 4  | 5 | 0.67 |
| Insulin                         | 1  | 4 | 0.14 |
| Metformin                       | 1  | 2 | 0.57 |
| Antidepressants                 | 4  | 4 | 1.00 |

Data are presented as Mean  $\pm$  SD unless stated otherwise. \*Multiple race categories selected. BMI = Body Mass Index;  $V\dot{O}_2$  = oxygen uptake; MoCA= Montreal Cognitive Assessment; mRS= Modified Rankin Scale; tPA = Tissue Plasminogen Activator; ACE= Angiotensin Converting Enzyme.



Table 4. MCAv Kinetics and Exercise Parameters For Responders and Non-Responders

|                                           | Responders<br>(n=12) | Responders<br>95 CI | Non-Responders<br>(n=10) | Non-Responders<br>95 CI | F-test | P-value |
|-------------------------------------------|----------------------|---------------------|--------------------------|-------------------------|--------|---------|
| <b>Stoke Affected MCAv</b>                |                      |                     |                          |                         |        |         |
| BL (cm*sec <sup>-1</sup> )                | 54.2 ± 15.0          | 44.6 – 63.7         | 47.5 ± 17.7              | 34.8 - 60.2             | 0.9    | 0.35    |
| TD (s)                                    | 32.9 ± 40.5          | 7.1 – 58.6          | 110.1 ± 58.4±            | 37.6 - 182.6            | 10.0   | 0.006   |
| Amp (cm*sec <sup>-1</sup> )               | 8.2 ± 4.8            | 5.1 - 11.2          | 0.10 ± 3.2±              | -3.2 - 3.4              | 13.7   | 0.002   |
| τ (s)                                     | 30.2 ± 24.7          | 14.5 – 45.8         | 45.2 ± 53.8±             | -21.7 - 112.0           | 0.7    | 0.43    |
| <b>Non-Stroke Affected MCAv</b>           |                      |                     |                          |                         |        |         |
| BL (cm*sec <sup>-1</sup> )                | 59.9 ± 15.0          | 49.8 – 69.9         | 54.4 ± 13.5              | 41.9 - 66.9             | 0.23   | 0.64    |
| TD (s)                                    | 36.2 ± 34.1          | 13.3-59.1           | 107.8*                   | -                       | -      | -       |
| Amp (cm*sec <sup>-1</sup> )               | 8.3 ± 4.4            | 5.3 - 11.3          | -5.2*                    | -                       | -      | -       |
| τ (s)                                     | 22.7 ± 17.5          | 11.0 – 34.6         | 54.6*                    | -                       | -      | -       |
| BL MAP (mmHg)                             | 77.6 ± 19.1          | 65.3 - 89.7         | 80.6 ± 19.0              | 67.0 - 94.2             | 0.14   | 0.71    |
| SS MAP (mmHg)                             | 98.4 ± 16.8          | 87.7 - 109.1        | 91.2 ± 25.6              | 72.9 - 109.6            | 0.6    | 0.44    |
| Δ MAP (mmHg)                              | 20.8 ± 9.6           | 14.7 – 26.9         | 10.6 ± 12.0              | 2.0 - 19.2              | 7.3    | 0.04    |
| BL P <sub>ET</sub> CO <sub>2</sub> (mmHg) | 34.6 ± 3.6           | 32.3 - 37.0         | 35.1 ± 5.1               | 31.2 - 39.1             | 0.1    | 0.81    |
| SS P <sub>ET</sub> CO <sub>2</sub> (mmHg) | 39.3 ± 4.4           | 36.5 - 41.6         | 38.2 ± 4.4               | 34.9 - 41.6             | 0.3    | 0.61    |
| Δ P <sub>ET</sub> CO <sub>2</sub> (mmHg)  | 4.6 ± 2.3            | 3.2 – 6.1           | 3.1 ± 1.8                | 1.7 - 4.5               | 1.6    | 0.13    |
| BL HR (bpm)                               | 65.4 ± 8.9           | 59.8 - 71.1         | 69.9 ± 11.3              | 61.8 - 77.9             | 1.1    | 0.31    |
| SS HR (bpm)                               | 94.5 ± 13.1          | 86.2 - 102.8        | 87.6 ± 18.1              | 74.6 - 100.6            | 1.1    | 0.31    |
| Δ HR (bpm)                                | 29.1 ± 9.5           | 23.1 - 35.1         | 17.7 ± 11.9              | 9.2 - 26.3              | 6.2    | 0.02    |
| Workload (watts)                          | 52.9 ± 25.4          | 36.8-69.1           | 36.0 ± 12.0              | 27.4-44.6               | 3.7    | 0.07    |
| RPE                                       | 12.8 ± 2.2           | 11.3-14.2           | 13.4 ± 3.1               | 11.2-15.6               | 0.3    | 0.58    |

---

Data are presented as Mean  $\pm$  SD. CI= Confidence Interval; BL= Baseline MCAv; TD= Time Delay; Amp= Amplitude;  $\tau$  = Time Constant; BL= Baseline; SS= Steady-State Exercise; MAP= Mean Arterial Pressure; P<sub>ET</sub>CO<sub>2</sub>= End Tidal Carbon Dioxide; HR= Heart Rate; RPE= Rate of Perceived Exertion.  $\pm$  Data represent n = 5. \*Data represents 1 dataset that modeled an exponential response.

---

452 **Figure 1.** Responders versus Non-Responders, Stroke Affected and Non-Stroke Affected MCAv  
453 response to moderate intensity exercise  
454

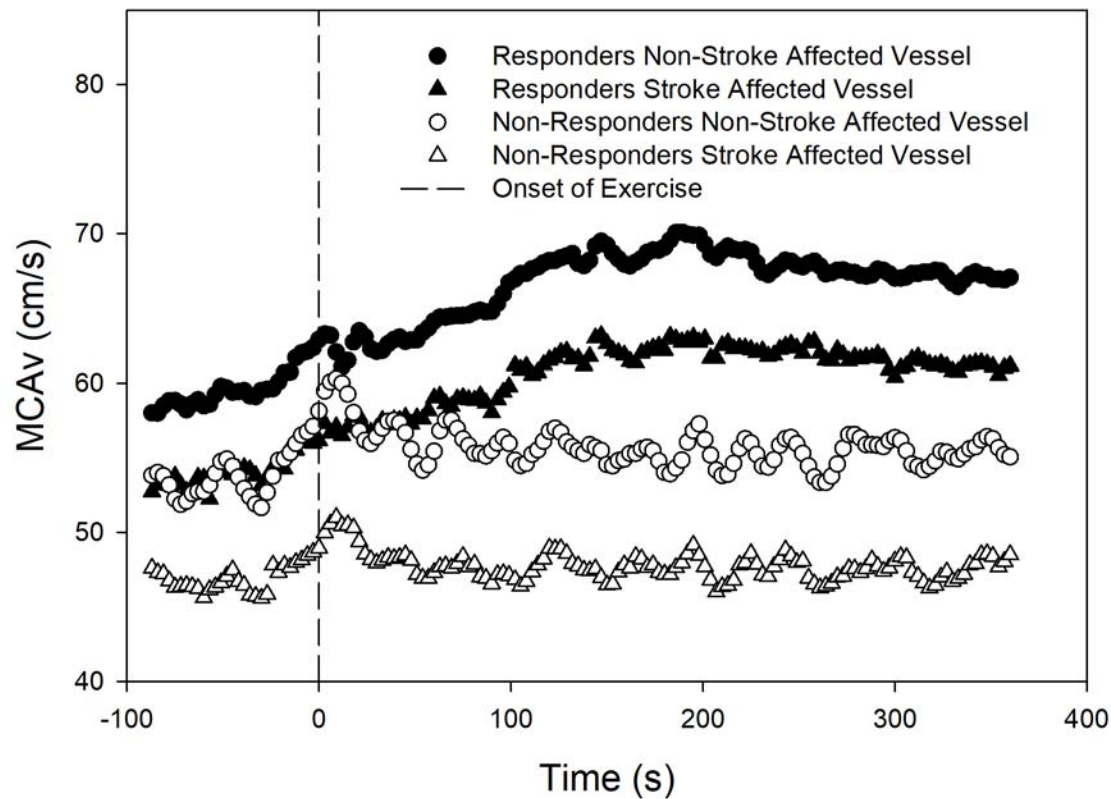

455
